# Supplementary material for: UVA absorption and photostability of coumarins
Source: Royal Society of Chemistry journal article supplement (doi:10.1039/c0pp00057d), 2010-06-14
Supplement: c0pp00057d.pdf [file c0pp00057d.pdf]

**Irradiance of the UVB and UVA lamps used in the photostability experiment.**

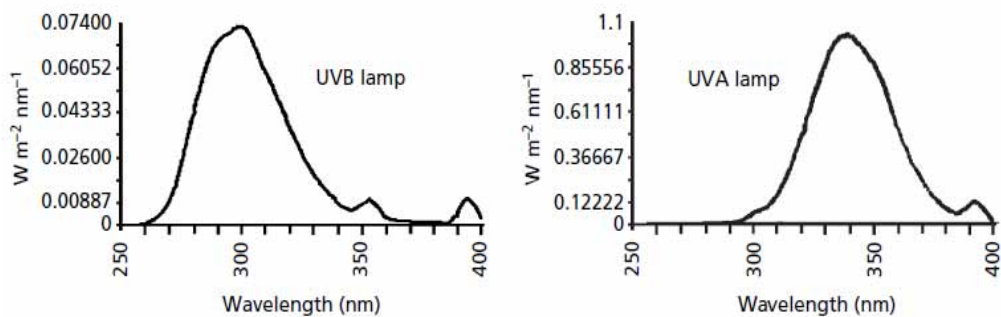

### Compound characterization

*7-Hydroxy-4-methylcoumarin (H-7)*: 65%. Yellow solid. M.p. 186 - 187 °C. Retention factor ( $R_f$ ) 0.23 (SiO<sub>2</sub>, hexane/EtOAc, 70:30). Molar absorption coefficient ( $\epsilon$ ) 16,271 M<sup>-1</sup>cm<sup>-1</sup>. ATR-FTIR (neat, cm<sup>-1</sup>); 3151 (OH str.) 3122 (=C-H str.), 3006 (=C-H str. of aromatic), 1673 (C=O str.), 1583 (C=C str.) and 1065 (C-O str.). <sup>1</sup>H NMR (*d*<sub>6</sub>-DMSO,  $\delta$ , ppm); 10.56 (br, s, 1H, -OH), 7.57 (d,  $J$  = 8.6 Hz, 1H, Ar-H), 6.78 (d,  $J$  = 8.8 Hz, 1H, Ar-H), 6.68 (s, 1H, Ar-H), 6.11 (s, 1H, =CH) and 2.31 (s, 3H, -CH<sub>3</sub>); <sup>13</sup>C NMR (*d*<sub>6</sub>-DMSO,  $\delta$ , ppm); 161.5, 160.7, 155.2, 153.8, 126.9, 113.2, 112.4, 110.6, 110.5 and 18.5. MS  $m/z$ : 177.033 [obtained M+1]<sup>+</sup>, 176.169 [M cal].

*7-Methoxy-4-methylcoumarin (M-7)*: 23%. Yellow solid. M.p. 159 - 160 °C.  $R_f$  0.38 (SiO<sub>2</sub>, hexane/EtOAc, 70:30).  $\epsilon$  15,496 M<sup>-1</sup>cm<sup>-1</sup>. ATR-FTIR (neat, cm<sup>-1</sup>); 3061 (=C-H str.), 3019 (=C-H str. of aromatic), 2952 (-C-H str.), 1721 (C=O str.), 1605 (C=C str.), 1509 (C=C str.), 1217 (C-O str. of ether), 1065 (C-O str. of ester). <sup>1</sup>H NMR (CDCl<sub>3</sub>,  $\delta$ , ppm); 7.48 (d,  $J$  = 8.8 Hz, 1H, Ar-H), 6.84 (d,  $J$  = 8.8 Hz, 1H, Ar-H), 6.79 (s, 1H, Ar-H), 6.10 (s, 1H, =CH), 3.85 (s, 1H, OCH<sub>3</sub>) and 2.38 (s, 3H, CH<sub>3</sub>); <sup>13</sup>C NMR (CDCl<sub>3</sub>,  $\delta$ , ppm); 162.6, 161.3, 155.2, 152.6, 125.5, 113.5, 112.3, 111.9, 100.8, 55.7 and 18.7. MS  $m/z$ : 191.053 [obtained M+1]<sup>+</sup>, 190.195 [M cal].

*4-Methyl-7-octyloxy coumarin (O-7)*: 78%. Yellow wax. M.p. 40 - 41 °C.  $R_f$  0.69 (SiO<sub>2</sub>, hexane/EtOAc, 70:30).  $\epsilon$  16,243 M<sup>-1</sup>cm<sup>-1</sup>. ATR-FTIR (neat, cm<sup>-1</sup>); 2921, 2853 (-C-H str.), 1720 (C=O str.), 1607 (C=C str.), 1505 (C=C str.), 1138 (C-O str. of ether), 1063 (C-O str. of ester). <sup>1</sup>H NMR (CDCl<sub>3</sub>,  $\delta$ , ppm); 7.45 (d,  $J$  = 8.8 Hz, 1H, Ar-H), 6.83 (d,  $J$  = 8.8 Hz, 1H, Ar-H), 6.77 (d,  $J$  = 2.4 Hz, 1H, Ar-H), 6.09 (s, 1H, =CH), 3.98 (t,  $J$  = 6.4 Hz, 2H, -OCH<sub>2</sub>C<sub>7</sub>H<sub>15</sub>), 2.36 (s, 3H, -CH<sub>3</sub>) and 1.85 - 0.81 (m, 15H, -C<sub>7</sub>H<sub>15</sub>); <sup>13</sup>C NMR (CDCl<sub>3</sub>,  $\delta$ , ppm); 162.2, 161.4, 155.2, 152.6, 125.4, 113.3, 112.6, 111.7, 101.3, 68.6, 31.8, 29.3, 29.2, 29.0, 25.9, 22.6, 18.7 and 14.1. MS  $m/z$ : 289.214 [obtained M+1]<sup>+</sup>, 288.381 [M cal].

*7,8-Dihydroxy-4-methylcoumarin (H-78)*: 72%. Yellow solid. M.p. 234 - 235 °C.  $R_f$  0.11 (SiO<sub>2</sub>, hexane/EtOAc, 70:30).  $\epsilon$  11,775 M<sup>-1</sup>cm<sup>-1</sup>. ATR-FTIR (neat, cm<sup>-1</sup>); 3465 (OH str.), 3219 (=C-H str. of aromatic), 3106 (=C-H str. of aromatic), 2983 (-C-H str.), 1642 (C=O str.), 1578 (C=C str.) and 1057 (C-O str.). <sup>1</sup>H NMR (*d*<sub>6</sub>-DMSO,  $\delta$ , ppm); 10.07 (br, s, 1H, -OH), 9.28 (br, s, 1H, -OH), 7.01 (d,  $J$  = 8.6 Hz, 1H, Ar-H), 6.77 (d,  $J$  = 8.4 Hz, 1H, Ar-H), 6.04 (s, 1H, =CH) and 2.28 (s, 3H, -CH<sub>3</sub>); <sup>13</sup>C NMR (*d*<sub>6</sub>-DMSO,  $\delta$ , ppm); 160.7, 154.4, 149.8, 143.7, 132.5, 115.9, 113.2, 112.5, 110.6 and 18.6. MS  $m/z$ : 193.068 [obtained M+1]<sup>+</sup>, 192.168 [M cal].

*5,7-Dihydroxy-4-methylcoumarin (H-57)*: 65%. Yellow solid. M.p. 285 - 286 °C.  $R_f$  0.04 (SiO<sub>2</sub>, hexane/EtOAc, 70:30).  $\epsilon$  13,324 M<sup>-1</sup>cm<sup>-1</sup>. ATR-FTIR (neat, cm<sup>-1</sup>); 3419 (OH str.), 3126 (=C-H str.), 3029 (=C-H str. of aromatic), 2987 (-C-H str.), 1667 (C=O str.), 1556 (C=C str.), 1479 (C=C str.) and 1159 (C-O str.). <sup>1</sup>H NMR (*d*<sub>6</sub>-Acetone,  $\delta$ , ppm); 9.60 (br, s, 1H, -OH), 9.34 (br, s, 1H, -OH), 6.35 (s, 1H, Ar-H), 6.27 (s, 1H, Ar-H), 5.83 (s, 1H, =CH) and 2.55 (s, 3H, -CH<sub>3</sub>); <sup>13</sup>C NMR (*d*<sub>6</sub>-DMSO,  $\delta$ , ppm); 161.5, 160.5, 158.4, 156.9, 155.4, 109.2, 102.5, 99.5, 94.9 and 23.9. MS  $m/z$ : 193.068 [obtained M+1]<sup>+</sup>, 192.168 [M cal].

*5,7-Dimethoxy-4-methylcoumarin (M-57)*: 68%. White solid. M.p. 173 - 174 °C.  $R_f$  0.35 (SiO<sub>2</sub>, hexane/EtOAc, 70:30).  $\epsilon$  15,810 M<sup>-1</sup>cm<sup>-1</sup>. ATR-FTIR (neat, cm<sup>-1</sup>); 3003 (=C-H str. of aromatic), 2929 (-C-H str.), 1727 (C=O str.), 1605 (C=C str.), 1149, 1110 (C-O str. of ether) and 1065 (C-O str. of ester). <sup>1</sup>H NMR (CDCl<sub>3</sub>,  $\delta$ , ppm); 6.41 (s, 1H, Ar-H), 6.27 (s, 1H, Ar-H), 5.93 (s, 1H, =CH), 3.83 (s, 1H, -OCH<sub>3</sub>), 2.51 (s, 3H, -OCH<sub>3</sub>) and 1.73 (s, 1H, CH<sub>3</sub>); <sup>13</sup>C NMR (CDCl<sub>3</sub>,  $\delta$ , ppm); 161.1, 162.7, 159.1, 156.9, 154.5, 111.3, 104.8, 95.4, 93.3, 55.7, 55.7 and 24.2. MS  $m/z$ : 221.089 [obtained M+1]<sup>+</sup>, 220.221 [M cal].

*6,7-Dimethoxy-4-methylcoumarin (M-67)*: 27%. White solid. M.p. 135 - 136 °C.  $R_f$  0.14 (SiO<sub>2</sub>, hexane/EtOAc, 70:30).  $\epsilon$  11,684 M<sup>-1</sup>cm<sup>-1</sup>. ATR-FTIR (neat, cm<sup>-1</sup>); 3046 (=C-H str. of aromatic), 2985, 2931, 2837 (-C-H str.), 1711 (C=O str.), 1613 (C=C str.), 1512 (C=C str.), 1276, 1158 (C-O str. of ether) and 1067 (s, C-O str. of ester). <sup>1</sup>H NMR (CDCl<sub>3</sub>,  $\delta$ , ppm); 6.85 (s, 1H, Ar-H), 6.72 (s, 1H, Ar-H), 6.08 (s, 1H, =CH) and 2.39 (s, 3H, -CH<sub>3</sub>); <sup>13</sup>C NMR (CDCl<sub>3</sub>,  $\delta$ , ppm); 161.4, 152.6, 152.5, 149.2, 146.0, 112.4, 112.1, 105.0, 99.9, 56.3, 56.3 and 18.9. MS  $m/z$ : 243.081 [obtained M+23]<sup>+</sup>, 220.221 [M cal].

## Text file of the optimized 3D structure of the dimer of EH-67 (Hyperchem 7)

HyperChem  
Geometry optimization, SemiEmpirical, molecule = C:\Documents and Settings\customer\Desktop\hyperchem\dimer of EH-67-4.hin.  
PM3  
PolakRibiere optimizer  
Convergence limit = 0.0100000 Iteration limit = 50  
Accelerate convergence = YES  
Optimization algorithm = Polak-Ribiere  
Criterion of RMS gradient = 0.1000 kcal/(A mol) Maximum cycles = 2175  
RHF Calculation:  
  
Singlet state calculation  
Number of electrons = 344  
Number of Double Occupied Levels = 172  
Charge on the System = 0  
Total Orbitals = 328  
  
Starting PM3 calculation with 328 orbitals  
  
E=0.0000 Grad=0.000 Conv=NO(0 cycles 0 points) [Iter=1 Diff=63855.80204]  
E=0.0000 Grad=0.000 Conv=NO(0 cycles 0 points) [Iter=2 Diff=372.50100]  
E=0.0000 Grad=0.000 Conv=NO(0 cycles 0 points) [Iter=3 Diff=54.49106]  
E=0.0000 Grad=0.000 Conv=NO(0 cycles 0 points) [Iter=4 Diff=11.56627]  
E=0.0000 Grad=0.000 Conv=NO(0 cycles 0 points) [Iter=5 Diff=1.03660]  
E=0.0000 Grad=0.000 Conv=NO(0 cycles 0 points) [Iter=6 Diff=0.24670]  
E=0.0000 Grad=0.000 Conv=NO(0 cycles 0 points) [Iter=7 Diff=0.10077]  
E=0.0000 Grad=0.000 Conv=NO(0 cycles 0 points) [Iter=8 Diff=0.01836]  
E=0.0000 Grad=0.000 Conv=NO(0 cycles 0 points) [Iter=9 Diff=0.00106]  
E=-14323.7191 Grad=0.097 Conv=YES(0 cycles 1 points) [Iter=1 Diff=0.00000]

### ENERGIES AND GRADIENT

Total Energy = -228976.8446502 (kcal/mol)  
Total Energy = -364.890543252 (a.u.)  
Binding Energy = -14323.7191122 (kcal/mol)  
Isolated Atomic Energy = -214653.1255380 (kcal/mol)  
Electronic Energy = -3596330.0775700 (kcal/mol)  
Core-Core Interaction = 3367353.2329198 (kcal/mol)  
Heat of Formation = -413.5091122 (kcal/mol)  
Gradient = 0.0973491 (kcal/mol/Ang)

### MOLECULAR POINT GROUP

C1

### EIGENVALUES(eV)

Symmetry: 1 A 2 A 3 A 4 A 5 A  
Eigenvalue: -44.875061 -42.906612 -42.257526 -41.139751 -40.876259

Symmetry: 6 A 7 A 8 A 9 A 10 A  
Eigenvalue: -40.371109 -39.719563 -38.795212 -38.600304 -37.469254

Symmetry: 11 A 12 A 13 A 14 A 15 A  
Eigenvalue: -37.159336 -37.020721 -36.716259 -36.026741 -35.684929

Symmetry: 16 A 17 A 18 A 19 A 20 A

Eigenvalue: -35.408714 -35.038952 -34.535320 -34.288685 -32.081879

Symmetry: 21 A 22 A 23 A 24 A 25 A  
Eigenvalue: -31.879143 -31.240995 -30.890764 -30.859276 -30.521347

Symmetry: 26 A 27 A 28 A 29 A 30 A  
Eigenvalue: -29.285208 -28.753849 -28.400866 -28.215801 -27.930532

Symmetry: 31 A 32 A 33 A 34 A 35 A  
Eigenvalue: -27.434753 -27.015152 -26.539385 -25.806587 -25.448765

Symmetry: 36 A 37 A 38 A 39 A 40 A  
Eigenvalue: -24.347672 -24.084171 -23.866587 -23.842350 -23.296528

Symmetry: 41 A 42 A 43 A 44 A 45 A  
Eigenvalue: -23.258936 -22.972261 -22.736303 -22.501358 -22.314377

Symmetry: 46 A 47 A 48 A 49 A 50 A  
Eigenvalue: -22.264120 -21.982531 -21.865177 -21.649086 -21.512369

Symmetry: 51 A 52 A 53 A 54 A 55 A  
Eigenvalue: -20.869610 -20.837622 -20.720392 -20.375446 -20.132452

Symmetry: 56 A 57 A 58 A 59 A 60 A  
Eigenvalue: -19.742813 -19.623632 -19.326096 -19.097673 -18.960621

Symmetry: 61 A 62 A 63 A 64 A 65 A  
Eigenvalue: -18.660545 -18.494577 -18.247934 -18.060591 -17.886328

Symmetry: 66 A 67 A 68 A 69 A 70 A  
Eigenvalue: -17.439085 -17.263132 -17.140793 -16.915689 -16.870651

Symmetry: 71 A 72 A 73 A 74 A 75 A  
Eigenvalue: -16.824800 -16.763443 -16.641529 -16.561588 -16.481707

Symmetry: 76 A 77 A 78 A 79 A 80 A  
Eigenvalue: -16.364256 -16.303303 -16.296141 -16.195910 -16.157837

Symmetry: 81 A 82 A 83 A 84 A 85 A  
Eigenvalue: -16.063566 -16.003561 -15.901015 -15.807764 -15.773310

Symmetry: 86 A 87 A 88 A 89 A 90 A  
Eigenvalue: -15.643689 -15.620778 -15.534667 -15.398162 -15.379847

Symmetry: 91 A 92 A 93 A 94 A 95 A  
Eigenvalue: -15.308391 -15.236953 -15.167840 -15.085799 -15.066725

Symmetry: 96 A 97 A 98 A 99 A 100 A  
Eigenvalue: -14.947688 -14.896455 -14.860745 -14.823191 -14.704031

Symmetry: 101 A 102 A 103 A 104 A 105 A  
Eigenvalue: -14.689554 -14.587900 -14.567878 -14.536782 -14.477372

Symmetry: 106 A 107 A 108 A 109 A 110 A  
Eigenvalue: -14.407774 -14.329296 -14.278560 -14.205961 -14.159431

Symmetry: 111 A 112 A 113 A 114 A 115 A  
Eigenvalue: -14.054877 -13.944592 -13.902613 -13.877948 -13.822707

Symmetry: 116 A 117 A 118 A 119 A 120 A  
Eigenvalue: -13.722523 -13.654029 -13.532920 -13.443342 -13.384642

Symmetry: 121 A 122 A 123 A 124 A 125 A  
Eigenvalue: -13.334540 -13.300450 -13.245397 -13.186399 -13.112423

Symmetry: 126 A 127 A 128 A 129 A 130 A  
Eigenvalue: -13.062754 -12.975987 -12.948813 -12.920347 -12.877932

Symmetry: 131 A 132 A 133 A 134 A 135 A  
Eigenvalue: -12.851955 -12.761524 -12.746979 -12.661724 -12.621163

Symmetry: 136 A 137 A 138 A 139 A 140 A  
Eigenvalue: -12.587151 -12.556046 -12.511679 -12.502710 -12.419311

Symmetry: 141 A 142 A 143 A 144 A 145 A  
Eigenvalue: -12.352450 -12.276207 -12.242054 -12.177514 -12.171997

Symmetry: 146 A 147 A 148 A 149 A 150 A  
Eigenvalue: -12.097619 -12.076070 -12.008366 -11.889535 -11.845014

Symmetry: 151 A 152 A 153 A 154 A 155 A  
Eigenvalue: -11.794250 -11.739104 -11.700638 -11.619184 -11.582847

Symmetry: 156 A 157 A 158 A 159 A 160 A  
Eigenvalue: -11.510509 -11.410488 -11.400829 -11.370610 -11.232810

Symmetry: 161 A 162 A 163 A 164 A 165 A  
Eigenvalue: -11.217950 -11.156642 -11.111074 -11.054314 -10.942421

Symmetry: 166 A 167 A 168 A 169 A 170 A  
Eigenvalue: -10.930963 -10.836268 -10.641062 -9.955121 -9.911338

Symmetry: 171 A 172 A 173 A 174 A 175 A  
Eigenvalue: -9.306362 -9.201542 -0.375232 -0.276869 -0.224417

Symmetry: 176 A 177 A 178 A 179 A 180 A  
Eigenvalue: -0.106161 0.595983 0.814166 1.259173 1.469181

Symmetry: 181 A 182 A 183 A 184 A 185 A  
Eigenvalue: 1.758302 1.851446 1.928135 2.011019 2.068769

Symmetry: 186 A 187 A 188 A 189 A 190 A  
Eigenvalue: 2.143586 2.190000 2.334582 2.368198 2.553112

Symmetry: 191 A 192 A 193 A 194 A 195 A  
Eigenvalue: 2.665951 2.706729 2.811599 2.829330 2.892839

Symmetry: 196 A 197 A 198 A 199 A 200 A  
Eigenvalue: 3.003141 3.088890 3.105106 3.172804 3.221043

Symmetry: 201 A 202 A 203 A 204 A 205 A  
Eigenvalue: 3.250672 3.274386 3.299556 3.337359 3.355791

Symmetry: 206 A 207 A 208 A 209 A 210 A  
Eigenvalue: 3.382210 3.399763 3.415379 3.443559 3.457056

Symmetry: 211 A 212 A 213 A 214 A 215 A  
Eigenvalue: 3.465472 3.489036 3.503520 3.525632 3.554517

Symmetry: 216 A 217 A 218 A 219 A 220 A  
Eigenvalue: 3.576111 3.589844 3.605505 3.608825 3.652972

Symmetry: 221 A 222 A 223 A 224 A 225 A  
Eigenvalue: 3.682415 3.694726 3.713594 3.736015 3.743546

Symmetry: 226 A 227 A 228 A 229 A 230 A  
Eigenvalue: 3.746600 3.772011 3.784936 3.801041 3.809765

Symmetry: 231 A 232 A 233 A 234 A 235 A  
Eigenvalue: 3.820483 3.846165 3.862916 3.863981 3.878346

Symmetry: 236 A 237 A 238 A 239 A 240 A  
Eigenvalue: 3.895996 3.915875 3.921990 3.954268 3.963914

Symmetry: 241 A 242 A 243 A 244 A 245 A  
Eigenvalue: 3.974249 3.981852 3.996397 4.015051 4.045923

Symmetry: 246 A 247 A 248 A 249 A 250 A  
Eigenvalue: 4.054005 4.071146 4.089569 4.096289 4.108818

Symmetry: 251 A 252 A 253 A 254 A 255 A  
Eigenvalue: 4.120926 4.123839 4.139019 4.144416 4.156291

Symmetry: 256 A 257 A 258 A 259 A 260 A  
Eigenvalue: 4.181939 4.188220 4.195916 4.205617 4.223155

Symmetry: 261 A 262 A 263 A 264 A 265 A  
Eigenvalue: 4.231722 4.272217 4.286961 4.304687 4.327969

Symmetry: 266 A 267 A 268 A 269 A 270 A  
Eigenvalue: 4.355357 4.369600 4.385199 4.389717 4.399780

Symmetry: 271 A 272 A 273 A 274 A 275 A  
Eigenvalue: 4.413527 4.426725 4.458828 4.483694 4.497799

Symmetry: 276 A 277 A 278 A 279 A 280 A  
Eigenvalue: 4.512997 4.522321 4.541050 4.558966 4.570983

Symmetry: 281 A 282 A 283 A 284 A 285 A  
Eigenvalue: 4.585343 4.626620 4.633603 4.656351 4.676205

Symmetry: 286 A 287 A 288 A 289 A 290 A  
Eigenvalue: 4.689061 4.722444 4.744257 4.756305 4.767586

Symmetry: 291 A 292 A 293 A 294 A 295 A  
Eigenvalue: 4.795281 4.820664 4.831824 4.849032 4.883083

Symmetry: 296 A 297 A 298 A 299 A 300 A

Eigenvalue: 4.889971 4.895191 4.921332 4.963223 5.002479

Symmetry: 301 A 302 A 303 A 304 A 305 A  
Eigenvalue: 5.013305 5.029659 5.033594 5.060184 5.065260

Symmetry: 306 A 307 A 308 A 309 A 310 A  
Eigenvalue: 5.079001 5.090429 5.100073 5.138269 5.154849

Symmetry: 311 A 312 A 313 A 314 A 315 A  
Eigenvalue: 5.193176 5.240541 5.256018 5.278534 5.289892

Symmetry: 316 A 317 A 318 A 319 A 320 A  
Eigenvalue: 5.293774 5.344119 5.404444 5.510440 5.605680

Symmetry: 321 A 322 A 323 A 324 A 325 A  
Eigenvalue: 5.658188 5.840594 5.905499 5.999612 6.210755

Symmetry: 326 A 327 A 328 A  
Eigenvalue: 6.396995 6.662723 6.762603

#### ATOMIC ORBITAL ELECTRON POPULATIONS

AO: 1 S C 1 Px C 1 Py C 1 Pz C 2 S C  
1.182365 0.950926 0.982528 0.965189 1.171320

AO: 2 Px C 2 Py C 2 Pz C 3 S C 3 Px C  
1.005280 1.000305 0.953905 1.164971 1.005333

AO: 3 Py C 3 Pz C 4 S C 4 Px C 4 Py C  
0.985672 0.954397 1.162051 0.997814 0.993684

AO: 4 Pz C 5 S C 5 Px C 5 Py C 5 Pz C  
0.955444 1.167174 0.947974 0.946497 0.856789

AO: 6 S C 6 Px C 6 Py C 6 Pz C 7 S C  
1.177960 0.993744 1.010605 0.952462 1.165238

AO: 7 Px C 7 Py C 7 Pz C 8 S C 8 Px C  
0.903337 0.913347 0.934967 1.172105 0.922181

AO: 8 Py C 8 Pz C 9 S C 9 Px C 9 Py C  
0.959084 0.921638 1.176794 0.962963 0.981136

AO: 9 Pz C 10 S C 10 Px C 10 Py C 10 Pz C  
0.959560 1.172093 1.005811 1.018176 0.935039

AO: 11 S O 11 Px O 11 Py O 11 Pz O 12 S C  
1.824964 1.483537 1.531273 1.318982 1.187830

AO: 12 Px C 12 Py C 12 Pz C 13 S C 13 Px C  
0.801524 0.832422 0.821904 1.189597 0.929741

AO: 13 Py C 13 Pz C 14 S C 14 Px C 14 Py C  
0.930078 0.928764 1.192017 0.969797 0.958524

AO: 14 Pz C 15 S O 15 Px O 15 Py O 15 Pz O  
0.985487 1.840648 1.451409 1.729881 1.181762

AO: 17 S C 17 Px C 17 Py C 17 Pz C 18 S C  
1.144839 0.966669 1.021278 0.989173 1.187441

AO: 18 Px C 18 Py C 18 Pz C 19 S C 19 Px C  
0.928382 0.908181 0.950533 1.190819 0.932928

AO: 19 Py C 19 Pz C 20 S C 20 Px C 20 Py C  
0.964779 1.010020 1.190930 0.875331 0.793690

AO: 20 Pz C 21 S C 21 Px C 21 Py C 21 Pz C  
0.784942 1.171715 0.974868 0.985402 1.031628

AO: 22 S C 22 Px C 22 Py C 22 Pz C 23 S C  
1.160593 0.875399 0.896369 0.946583 1.175606

AO: 23 Px C 23 Py C 23 Pz C 24 S C 24 Px C  
1.007674 0.969585 1.048074 1.175783 0.979134

AO: 24 Py C 24 Pz C 25 S C 25 Px C 25 Py C  
0.932569 0.974110 1.165910 0.897835 0.946670

AO: 25 Pz C 26 S C 26 Px C 26 Py C 26 Pz C  
0.988137 1.167727 0.931742 0.883554 0.906060

AO: 27 S C 27 Px C 27 Py C 27 Pz C 34 S O  
1.146426 1.020382 1.014144 0.944438 1.834459

AO: 34 Px O 34 Py O 34 Pz O 38 S C 38 Px C  
1.579411 1.357556 1.409876 1.167428 0.890543

AO: 38 Py C 38 Pz C 39 S C 39 Px C 39 Py C  
0.957892 0.937466 1.168314 0.924076 0.978203

AO: 39 Pz C 40 S O 40 Px O 40 Py O 40 Pz O  
0.884040 1.843748 1.268316 1.173523 1.917031

AO: 42 S C 42 Px C 42 Py C 42 Pz C 43 S C  
1.186425 0.956881 1.023779 0.941274 1.187199

AO: 43 Px C 43 Py C 43 Pz C 45 S O 45 Px O  
1.027273 0.940490 0.952701 1.839236 1.334252

AO: 45 Py O 45 Pz O 46 S C 46 Px C 46 Py C  
1.227751 1.795378 1.165995 0.985196 0.838475

AO: 46 Pz C 47 S C 47 Px C 47 Py C 47 Pz C  
0.956752 1.167134 0.977121 1.025225 0.940398

AO: 48 S C 48 Px C 48 Py C 48 Pz C 49 S C  
1.166947 0.975225 0.993580 0.982919 1.162786

AO: 49 Px C 49 Py C 49 Pz C 50 S C 50 Px C  
0.972007 0.983626 0.994162 1.142748 0.989664

AO: 50 Py C 50 Pz C 56 S C 56 Px C 56 Py C



|     |          |          |          |          |          |
|-----|----------|----------|----------|----------|----------|
|     | 1.009764 | 0.986418 | 1.161568 | 1.007820 | 0.942993 |
| AO: | 56 Pz C  | 57 S C   | 57 Px C  | 57 Py C  | 57 Pz C  |
|     | 0.986887 | 1.142233 | 1.012043 | 0.964151 | 1.005669 |
| AO: | 61 S C   | 61 Px C  | 61 Py C  | 61 Pz C  | 62 S C   |
|     | 1.163801 | 0.952972 | 1.025271 | 0.971349 | 1.138081 |
| AO: | 62 Px C  | 62 Py C  | 62 Pz C  | 64 S C   | 64 Px C  |
|     | 1.000097 | 1.007492 | 0.963768 | 1.138119 | 0.993850 |
| AO: | 64 Py C  | 64 Pz C  | 73 S C   | 73 Px C  | 73 Py C  |
|     | 0.982308 | 0.995278 | 1.170106 | 1.012501 | 0.814505 |
| AO: | 73 Pz C  | 74 S C   | 74 Px C  | 74 Py C  | 74 Pz C  |
|     | 0.964915 | 1.189991 | 0.965955 | 0.979181 | 0.984052 |
| AO: | 75 S C   | 75 Px C  | 75 Py C  | 75 Pz C  | 76 S C   |
|     | 1.173121 | 0.958138 | 0.969736 | 1.030230 | 1.163284 |
| AO: | 76 Px C  | 76 Py C  | 76 Pz C  | 77 S C   | 77 Px C  |
|     | 0.957165 | 1.004742 | 0.980097 | 1.164182 | 0.961480 |
| AO: | 77 Py C  | 77 Pz C  | 79 S C   | 79 Px C  | 79 Py C  |
|     | 1.017017 | 0.977075 | 1.163961 | 0.949871 | 1.031071 |
| AO: | 79 Pz C  | 80 S C   | 80 Px C  | 80 Py C  | 80 Pz C  |
|     | 0.970225 | 1.152029 | 1.005343 | 1.022060 | 0.970860 |
| AO: | 83 S C   | 83 Px C  | 83 Py C  | 83 Pz C  | 90 S C   |
|     | 1.138464 | 0.954053 | 1.009061 | 1.008732 | 1.165421 |
| AO: | 90 Px C  | 90 Py C  | 90 Pz C  | 91 S C   | 91 Px C  |
|     | 0.998739 | 0.984229 | 0.957227 | 1.163875 | 1.007994 |
| AO: | 91 Py C  | 91 Pz C  | 92 S C   | 92 Px C  | 92 Py C  |
|     | 0.966840 | 0.966524 | 1.165049 | 0.959093 | 0.969048 |
| AO: | 92 Pz C  | 93 S C   | 93 Px C  | 93 Py C  | 93 Pz C  |
|     | 1.017671 | 1.159082 | 0.953538 | 0.968531 | 1.020844 |
| AO: | 94 S C   | 94 Px C  | 94 Py C  | 94 Pz C  | 95 S C   |
|     | 1.162358 | 0.941380 | 0.995931 | 1.003258 | 1.145824 |
| AO: | 95 Px C  | 95 Py C  | 95 Pz C  | 99 S C   | 99 Px C  |
|     | 0.985511 | 1.000058 | 1.007431 | 1.141064 | 1.000208 |
| AO: | 99 Py C  | 99 Pz C  | 141 S O  | 141 Px O | 141 Py O |
|     | 0.968216 | 1.010022 | 1.825502 | 1.410550 | 1.362049 |
| AO: | 141 Pz O | 142 S O  | 142 Px O | 142 Py O | 142 Pz O |
|     | 1.564364 | 1.862632 | 1.314504 | 1.265556 | 1.857339 |
| AO: | 144 S O  | 144 Px O | 144 Py O | 144 Pz O | 31 S H   |
|     | 1.862412 | 1.273524 | 1.553839 | 1.608030 | 0.945354 |

AO: 63 S H 32 S H 65 S H 66 S H 67 S H  
0.961716 0.888793 0.962244 0.961692 0.947883

AO: 68 S H 69 S H 70 S H 71 S H 72 S H  
0.948797 0.935082 0.922446 0.905758 0.876598

AO: 44 S H 33 S H 16 S H 35 S H 36 S H  
0.874917 0.857068 0.858931 0.941658 0.943412

AO: 78 S H 37 S H 28 S H 81 S H 82 S H  
0.934739 0.943053 0.888691 0.943399 0.953109

AO: 51 S H 84 S H 85 S H 86 S H 87 S H  
0.959981 0.961961 0.961075 0.942786 0.929268

AO: 88 S H 89 S H 52 S H 53 S H 54 S H  
0.936626 0.935995 0.958227 0.940777 0.945831

AO: 55 S H 29 S H 30 S H 96 S H 97 S H  
0.932847 0.942182 0.942356 0.950331 0.957439

AO: 98 S H 58 S H 100 S H 101 S H 102 S H  
0.910016 0.953651 0.950157 0.940709 0.946280

AO: 103 S H 104 S H 105 S H 106 S H 107 S H  
0.933541 0.949103 0.938113 0.952549 0.937072

AO: 108 S H 109 S H 110 S H 111 S H 112 S H  
0.947887 0.935115 0.908399 0.948932 0.962141

AO: 113 S H 114 S H 115 S H 116 S H 117 S H  
0.949969 0.932539 0.957447 0.962369 0.962309

AO: 118 S H 119 S H 120 S H 121 S H 122 S H  
0.950124 0.943319 0.946771 0.956318 0.940058

AO: 123 S H 124 S H 125 S H 126 S H 127 S H  
0.946201 0.948615 0.940105 0.933530 0.940546

AO: 128 S H 129 S H 130 S H 131 S H 132 S H  
0.935121 0.961680 0.962984 0.947271 0.948471

AO: 133 S H 134 S H 135 S H 136 S H 137 S H  
0.934396 0.961425 0.945388 0.941242 0.949142

AO: 138 S H 139 S H 140 S H 59 S H 60 S H  
0.945811 0.964180 0.949168 0.957576 0.948632

AO: 143 S H 41 S H 145 S H  
1.000233 0.959819 0.999621

NET CHARGES AND COORDINATES

| Atom | Z | Charge    | Coordinates(Angstrom) |         |         | Mass     |
|------|---|-----------|-----------------------|---------|---------|----------|
|      |   |           | x                     | y       | z       |          |
| 1    | 6 | -0.081007 | 0.16689               | 4.79796 | 6.43005 | 12.01100 |
| 2    | 6 | -0.130809 | -0.22843              | 4.98304 | 4.96347 | 12.01100 |

|    |   |           |          |          |          |          |
|----|---|-----------|----------|----------|----------|----------|
| 3  | 6 | -0.110373 | 0.55810  | 6.09738  | 4.29232  | 12.01100 |
| 4  | 6 | -0.108993 | 0.23847  | 6.17394  | 2.80844  | 12.01100 |
| 5  | 6 | 0.081567  | -0.19286 | -2.44499 | 3.86389  | 12.01100 |
| 6  | 6 | -0.134771 | -1.21706 | -3.32613 | 4.21029  | 12.01100 |
| 7  | 6 | 0.083111  | -1.61857 | -3.41058 | 5.54905  | 12.01100 |
| 8  | 6 | 0.024992  | 0.44112  | -1.67149 | 4.86001  | 12.01100 |
| 9  | 6 | -0.080454 | 0.01375  | -1.76655 | 6.18715  | 12.01100 |
| 10 | 6 | -0.131120 | -1.02634 | -2.62760 | 6.54941  | 12.01100 |
| 11 | 8 | -0.158754 | -2.61854 | -4.34149 | 5.76328  | 15.99900 |
| 12 | 6 | 0.356320  | -3.09352 | -4.53397 | 7.03104  | 12.01100 |
| 13 | 6 | 0.021820  | -1.45240 | -2.74470 | 7.98100  | 12.01100 |
| 14 | 6 | -0.105824 | -2.65703 | -3.71066 | 8.20562  | 12.01100 |
| 15 | 8 | -0.203700 | 0.05674  | -2.27003 | 2.51449  | 15.99900 |
| 17 | 6 | -0.121959 | -0.25599 | -3.12380 | 8.83669  | 12.01100 |
| 18 | 6 | 0.025463  | -2.34387 | -1.55417 | 8.55464  | 12.01100 |
| 19 | 6 | -0.098546 | -3.55578 | -2.52922 | 8.64772  | 12.01100 |
| 20 | 6 | 0.355107  | -4.73719 | -2.19845 | 7.77926  | 12.01100 |
| 21 | 6 | -0.163612 | -2.55806 | -0.38781 | 7.64832  | 12.01100 |
| 22 | 6 | 0.121055  | -3.70994 | -0.26080 | 6.86647  | 12.01100 |
| 23 | 6 | -0.200938 | -3.89691 | 0.82231  | 5.99496  | 12.01100 |
| 24 | 6 | -0.061596 | -1.59430 | 0.62404  | 7.58616  | 12.01100 |
| 25 | 6 | 0.001448  | -1.74556 | 1.70124  | 6.71837  | 12.01100 |
| 26 | 6 | 0.110917  | -2.90390 | 1.79799  | 5.90393  | 12.01100 |
| 27 | 6 | -0.125391 | -1.91675 | -1.06225 | 9.92810  | 12.01100 |
| 34 | 8 | -0.181302 | -2.96866 | 2.90512  | 5.09657  | 15.99900 |
| 38 | 6 | 0.046672  | 1.22479  | -2.93407 | 2.03232  | 12.01100 |
| 39 | 6 | 0.045368  | -3.91775 | 2.87907  | 4.03288  | 12.01100 |
| 40 | 8 | -0.202618 | 1.57225  | -0.92311 | 4.55604  | 15.99900 |
| 42 | 6 | -0.108359 | 1.34397  | -2.54998 | 0.55176  | 12.01100 |
| 43 | 6 | -0.107663 | -3.77175 | 4.21349  | 3.28802  | 12.01100 |
| 45 | 8 | -0.196617 | -0.65844 | 2.54574  | 6.57197  | 15.99900 |
| 46 | 6 | 0.053582  | -0.81580 | 3.84810  | 7.13397  | 12.01100 |
| 47 | 6 | -0.109878 | -4.51418 | 4.13778  | 1.94900  | 12.01100 |
| 48 | 6 | -0.118671 | -3.63941 | 3.59309  | 0.82972  | 12.01100 |
| 49 | 6 | -0.112582 | -2.50515 | 4.55180  | 0.49831  | 12.01100 |
| 50 | 6 | -0.128594 | -1.56318 | 3.97893  | -0.53431 | 12.01100 |
| 56 | 6 | -0.099269 | -4.29216 | 5.37443  | 4.13917  | 12.01100 |
| 57 | 6 | -0.124095 | -4.00125 | 6.70926  | 3.48917  | 12.01100 |
| 61 | 6 | -0.113393 | 1.62109  | 4.33087  | 6.53553  | 12.01100 |
| 62 | 6 | -0.109438 | 2.17659  | 4.45110  | 7.93582  | 12.01100 |
| 64 | 6 | -0.109555 | 1.06240  | 7.23537  | 2.11663  | 12.01100 |
| 73 | 6 | 0.037974  | 1.38187  | 0.48351  | 4.47680  | 12.01100 |
| 74 | 6 | -0.119180 | 0.92130  | 0.95880  | 3.09074  | 12.01100 |
| 75 | 6 | -0.131226 | 1.44973  | 2.36911  | 2.81624  | 12.01100 |
| 76 | 6 | -0.105289 | 2.96170  | 2.39647  | 2.67306  | 12.01100 |
| 77 | 6 | -0.119755 | 3.42062  | 1.69510  | 1.40557  | 12.01100 |
| 79 | 6 | -0.115129 | -0.60272 | 0.95935  | 2.98200  | 12.01100 |
| 80 | 6 | -0.150292 | -1.04742 | 1.10312  | 1.54577  | 12.01100 |
| 83 | 6 | -0.110310 | 4.92759  | 1.62008  | 1.32324  | 12.01100 |
| 90 | 6 | -0.105615 | 0.35280  | -3.33477 | -0.30927 | 12.01100 |
| 91 | 6 | -0.105233 | 0.27490  | -2.76258 | -1.71787 | 12.01100 |
| 92 | 6 | -0.110861 | -0.32963 | -1.36654 | -1.75132 | 12.01100 |
| 93 | 6 | -0.101995 | -1.83699 | -1.37021 | -1.55260 | 12.01100 |
| 94 | 6 | -0.102927 | 2.77504  | -2.78373 | 0.06626  | 12.01100 |
| 95 | 6 | -0.138825 | 3.75798  | -1.87866 | 0.77150  | 12.01100 |
| 99 | 6 | -0.119510 | -2.42505 | 0.01098  | -1.73701 | 12.01100 |

|     |   |           |          |          |          |          |
|-----|---|-----------|----------|----------|----------|----------|
| 141 | 8 | -0.162465 | -4.76097 | -1.15633 | 6.88764  | 15.99900 |
| 142 | 8 | -0.300031 | -3.86607 | -5.46551 | 7.01745  | 15.99900 |
| 144 | 8 | -0.297805 | -5.81291 | -2.75061 | 7.74080  | 15.99900 |
| 31  | 1 | 0.054646  | -0.52416 | -3.16881 | 9.90533  | 1.00800  |
| 63  | 1 | 0.038284  | 3.22714  | 4.13515  | 7.97153  | 1.00800  |
| 32  | 1 | 0.111207  | -3.93428 | -2.65650 | 9.68781  | 1.00800  |
| 65  | 1 | 0.037756  | 0.81960  | 7.29353  | 1.04794  | 1.00800  |
| 66  | 1 | 0.038308  | 0.88829  | 8.22968  | 2.54883  | 1.00800  |
| 67  | 1 | 0.052117  | -0.84540 | 6.37743  | 2.67000  | 1.00800  |
| 68  | 1 | 0.051203  | 0.34285  | 7.06888  | 4.78001  | 1.00800  |
| 69  | 1 | 0.064918  | -1.31674 | 5.19437  | 4.88837  | 1.00800  |
| 70  | 1 | 0.077554  | -0.06920 | 4.02575  | 4.41154  | 1.00800  |
| 71  | 1 | 0.094242  | -2.68128 | 4.40382  | 3.06684  | 1.00800  |
| 72  | 1 | 0.123402  | 0.49824  | -1.15121 | 6.95892  | 1.00800  |
| 44  | 1 | 0.125083  | -0.70945 | 0.54638  | 8.23924  | 1.00800  |
| 33  | 1 | 0.142932  | -4.81469 | 0.89119  | 5.39337  | 1.00800  |
| 16  | 1 | 0.141069  | -1.70909 | -3.93552 | 3.43982  | 1.00800  |
| 35  | 1 | 0.058342  | -1.05738 | -0.37685 | 9.83945  | 1.00800  |
| 36  | 1 | 0.056588  | -2.73140 | -0.51851 | 10.42211 | 1.00800  |
| 78  | 1 | 0.065261  | 0.71987  | 0.85513  | 5.28227  | 1.00800  |
| 37  | 1 | 0.056947  | -1.61429 | -1.89638 | 10.58146 | 1.00800  |
| 28  | 1 | 0.111309  | -2.47503 | -4.41511 | 9.05119  | 1.00800  |
| 81  | 1 | 0.056601  | -0.82478 | 0.20108  | 0.95612  | 1.00800  |
| 82  | 1 | 0.046891  | -2.13175 | 1.29578  | 1.47209  | 1.00800  |
| 51  | 1 | 0.040019  | -0.79078 | 4.70612  | -0.81454 | 1.00800  |
| 84  | 1 | 0.038039  | 5.38235  | 2.61861  | 1.28770  | 1.00800  |
| 85  | 1 | 0.038925  | 5.35443  | 1.09705  | 2.18967  | 1.00800  |
| 86  | 1 | 0.057214  | 3.41204  | 1.90708  | 3.56771  | 1.00800  |
| 87  | 1 | 0.070732  | 1.12957  | 3.06039  | 3.63145  | 1.00800  |
| 88  | 1 | 0.063374  | 0.95775  | 2.75154  | 1.89073  | 1.00800  |
| 89  | 1 | 0.064005  | -1.01114 | 0.02279  | 3.41235  | 1.00800  |
| 52  | 1 | 0.041773  | -2.09235 | 3.68643  | -1.45086 | 1.00800  |
| 53  | 1 | 0.059223  | -1.95171 | 4.78898  | 1.43898  | 1.00800  |
| 54  | 1 | 0.054169  | -4.25685 | 3.41150  | -0.07150 | 1.00800  |
| 55  | 1 | 0.067153  | -4.86387 | 5.16097  | 1.67690  | 1.00800  |
| 29  | 1 | 0.057818  | 0.13943  | -4.10431 | 8.54327  | 1.00800  |
| 30  | 1 | 0.057644  | 0.55606  | -2.38994 | 8.73345  | 1.00800  |
| 96  | 1 | 0.049669  | 3.72469  | -2.05028 | 1.86122  | 1.00800  |
| 97  | 1 | 0.042561  | 4.78536  | -2.04917 | 0.43010  | 1.00800  |
| 98  | 1 | 0.089984  | 1.10096  | -1.45365 | 0.42988  | 1.00800  |
| 58  | 1 | 0.046349  | -4.41238 | 6.73869  | 2.46567  | 1.00800  |
| 100 | 1 | 0.049843  | -2.31092 | -2.07934 | -2.26013 | 1.00800  |
| 101 | 1 | 0.059291  | 0.15492  | -0.74723 | -0.95988 | 1.00800  |
| 102 | 1 | 0.053720  | -0.29902 | -3.44666 | -2.37199 | 1.00800  |
| 103 | 1 | 0.066459  | -0.65021 | -3.31753 | 0.16341  | 1.00800  |
| 104 | 1 | 0.050897  | 0.64834  | -4.40212 | -0.35098 | 1.00800  |
| 105 | 1 | 0.061887  | 2.12869  | -2.59750 | 2.58877  | 1.00800  |
| 106 | 1 | 0.047451  | -4.94316 | 2.73991  | 4.43134  | 1.00800  |
| 107 | 1 | 0.062928  | -1.02358 | 1.78217  | 3.59930  | 1.00800  |
| 108 | 1 | 0.052113  | -0.53179 | 1.95479  | 1.05773  | 1.00800  |
| 109 | 1 | 0.064885  | 2.41560  | 0.84308  | 4.67199  | 1.00800  |
| 110 | 1 | 0.091601  | 1.35624  | 0.27445  | 2.30787  | 1.00800  |
| 111 | 1 | 0.051068  | 3.32347  | 3.44293  | 2.68124  | 1.00800  |
| 112 | 1 | 0.037859  | 5.24862  | 1.07749  | 0.42423  | 1.00800  |
| 113 | 1 | 0.050031  | 3.01570  | 2.21765  | 0.51667  | 1.00800  |
| 114 | 1 | 0.067461  | 2.97741  | 0.66662  | 1.37195  | 1.00800  |

|     |   |           |          |          |          |         |
|-----|---|-----------|----------|----------|----------|---------|
| 115 | 1 | 0.042553  | -2.00368 | 0.73437  | -1.02124 | 1.00800 |
| 116 | 1 | 0.037631  | -3.51238 | 0.00240  | -1.58837 | 1.00800 |
| 117 | 1 | 0.037691  | -2.23485 | 0.40255  | -2.74504 | 1.00800 |
| 118 | 1 | 0.049876  | -0.08318 | -0.88029 | -2.71531 | 1.00800 |
| 119 | 1 | 0.056681  | -2.08041 | -1.75123 | -0.53944 | 1.00800 |
| 120 | 1 | 0.053229  | 1.30814  | -2.72578 | -2.13329 | 1.00800 |
| 121 | 1 | 0.043682  | -2.91932 | 6.89349  | 3.41320  | 1.00800 |
| 122 | 1 | 0.059942  | -3.82350 | 5.33987  | 5.14363  | 1.00800 |
| 123 | 1 | 0.053799  | 3.52411  | -0.81048 | 0.61465  | 1.00800 |
| 124 | 1 | 0.051385  | 3.05817  | -3.84468 | 0.21575  | 1.00800 |
| 125 | 1 | 0.059895  | 2.79764  | -2.61935 | -1.03532 | 1.00800 |
| 126 | 1 | 0.066470  | 0.07684  | 5.78620  | 6.94786  | 1.00800 |
| 127 | 1 | 0.059454  | 2.23288  | 4.94426  | 5.83335  | 1.00800 |
| 128 | 1 | 0.064879  | 1.71890  | 3.28782  | 6.16827  | 1.00800 |
| 129 | 1 | 0.038320  | 1.62409  | 3.82620  | 8.65099  | 1.00800 |
| 130 | 1 | 0.037016  | 2.13200  | 5.48468  | 8.30456  | 1.00800 |
| 131 | 1 | 0.052729  | -3.69242 | 2.02452  | 3.36276  | 1.00800 |
| 132 | 1 | 0.051529  | -1.04636 | 3.07994  | -0.15338 | 1.00800 |
| 133 | 1 | 0.065604  | -3.22037 | 2.59758  | 1.11106  | 1.00800 |
| 134 | 1 | 0.038575  | 2.13797  | 7.02863  | 2.19823  | 1.00800 |
| 135 | 1 | 0.054612  | 0.41497  | 5.18530  | 2.33235  | 1.00800 |
| 136 | 1 | 0.058758  | 1.64739  | 5.91999  | 4.44793  | 1.00800 |
| 137 | 1 | 0.050858  | -2.91872 | 5.51757  | 0.14591  | 1.00800 |
| 138 | 1 | 0.054189  | -5.43005 | 3.52319  | 2.04933  | 1.00800 |
| 139 | 1 | 0.035820  | -0.59121 | 3.77216  | 8.21546  | 1.00800 |
| 140 | 1 | 0.050832  | -1.85422 | 4.21948  | 7.03163  | 1.00800 |
| 59  | 1 | 0.042424  | -4.44216 | 7.53851  | 4.05464  | 1.00800 |
| 60  | 1 | 0.051368  | -5.38133 | 5.25944  | 4.30820  | 1.00800 |
| 143 | 1 | -0.000233 | -6.60952 | -6.16583 | 8.43210  | 1.00800 |
| 41  | 1 | 0.040181  | 1.12232  | -4.02673 | 2.17077  | 1.00800 |
| 145 | 1 | 0.000379  | -6.93962 | -5.57161 | 8.59550  | 1.00800 |

#### ATOMIC GRADIENTS

Atom Z            Gradients(kcal/mol/Angstrom)

|    | x | y        | z        |          |
|----|---|----------|----------|----------|
| 1  | 6 | -0.01340 | 0.03701  | 0.01401  |
| 2  | 6 | 0.02162  | -0.00935 | 0.05230  |
| 3  | 6 | 0.01937  | -0.00291 | -0.01622 |
| 4  | 6 | 0.02892  | 0.03399  | -0.05958 |
| 5  | 6 | -0.01503 | 0.10499  | 0.07877  |
| 6  | 6 | 0.37703  | 0.27313  | 0.03675  |
| 7  | 6 | -0.07931 | 0.01315  | -0.06902 |
| 8  | 6 | 0.13874  | -0.06469 | -0.37679 |
| 9  | 6 | -0.18004 | -0.28006 | 0.16834  |
| 10 | 6 | 0.19953  | 0.35609  | -0.09652 |
| 11 | 8 | 0.10935  | 0.07512  | -0.04324 |
| 12 | 6 | 0.24162  | 0.19585  | 0.05030  |
| 13 | 6 | -0.11368 | -0.04459 | -0.05255 |
| 14 | 6 | -0.21491 | 0.02460  | -0.39958 |
| 15 | 8 | -0.00857 | 0.05345  | 0.20866  |
| 17 | 6 | -0.03235 | -0.02666 | 0.04599  |
| 18 | 6 | -0.10424 | 0.04998  | -0.03332 |
| 19 | 6 | 0.07081  | 0.11134  | 0.01043  |
| 20 | 6 | -0.14762 | -0.18918 | -0.10798 |
| 21 | 6 | -0.33455 | -0.50622 | 0.00894  |
| 22 | 6 | 0.07764  | -0.17143 | 0.07728  |

|     |   |          |          |          |
|-----|---|----------|----------|----------|
| 23  | 6 | 0.10585  | 0.21713  | -0.07092 |
| 24  | 6 | 0.17530  | 0.62302  | -0.40904 |
| 25  | 6 | 0.27656  | -0.37070 | 0.55870  |
| 26  | 6 | -0.09897 | 0.27782  | -0.28573 |
| 27  | 6 | -0.06071 | -0.08284 | -0.05409 |
| 34  | 8 | -0.18609 | -0.21203 | 0.05914  |
| 38  | 6 | -0.00200 | 0.05099  | 0.05281  |
| 39  | 6 | 0.07866  | -0.04370 | 0.10352  |
| 40  | 8 | -0.22831 | -0.00649 | 0.05646  |
| 42  | 6 | -0.07178 | -0.04023 | -0.01264 |
| 43  | 6 | -0.00390 | 0.05251  | -0.05354 |
| 45  | 8 | -0.20519 | -0.02929 | 0.04132  |
| 46  | 6 | -0.03514 | -0.06393 | -0.09083 |
| 47  | 6 | -0.03226 | 0.05775  | -0.04458 |
| 48  | 6 | -0.08848 | -0.00708 | 0.03008  |
| 49  | 6 | -0.01608 | 0.06675  | 0.07470  |
| 50  | 6 | -0.04389 | -0.03017 | 0.00216  |
| 56  | 6 | 0.02514  | 0.03472  | -0.01205 |
| 57  | 6 | -0.00876 | 0.01422  | 0.02310  |
| 61  | 6 | -0.02898 | -0.01476 | -0.00274 |
| 62  | 6 | -0.03750 | -0.03054 | 0.00260  |
| 64  | 6 | 0.05973  | 0.01210  | -0.01381 |
| 73  | 6 | 0.05603  | 0.05688  | 0.00512  |
| 74  | 6 | 0.04484  | 0.04426  | 0.10202  |
| 75  | 6 | 0.01380  | -0.06088 | -0.02869 |
| 76  | 6 | 0.09017  | -0.06146 | -0.06236 |
| 77  | 6 | 0.07353  | -0.04520 | -0.05017 |
| 79  | 6 | 0.04168  | 0.05135  | 0.05017  |
| 80  | 6 | 0.00644  | 0.02383  | -0.01824 |
| 83  | 6 | 0.01321  | -0.00882 | 0.01319  |
| 90  | 6 | 0.00757  | -0.03194 | -0.00042 |
| 91  | 6 | -0.00833 | -0.02486 | -0.02138 |
| 92  | 6 | -0.07847 | -0.03938 | 0.01384  |
| 93  | 6 | -0.04302 | -0.04902 | 0.04207  |
| 94  | 6 | 0.01836  | -0.07953 | 0.03725  |
| 95  | 6 | 0.03606  | 0.01838  | -0.02699 |
| 99  | 6 | -0.00068 | -0.08298 | 0.02470  |
| 141 | 8 | 0.10047  | -0.04418 | -0.01941 |
| 142 | 8 | -0.13039 | -0.19502 | 0.00139  |
| 144 | 8 | 0.13653  | 0.13742  | 0.04159  |
| 31  | 1 | -0.03416 | 0.04207  | -0.02089 |
| 63  | 1 | 0.00254  | -0.04733 | 0.01665  |
| 32  | 1 | -0.07291 | -0.09090 | -0.00020 |
| 65  | 1 | 0.03653  | -0.03647 | 0.03182  |
| 66  | 1 | 0.06925  | -0.02357 | 0.02888  |
| 67  | 1 | 0.02347  | 0.01898  | 0.01265  |
| 68  | 1 | 0.00596  | 0.00734  | 0.04102  |
| 69  | 1 | -0.02309 | -0.00931 | 0.00346  |
| 70  | 1 | -0.00038 | -0.05593 | -0.00243 |
| 71  | 1 | -0.03597 | -0.01168 | 0.02214  |
| 72  | 1 | 0.10508  | 0.00875  | 0.14948  |
| 44  | 1 | -0.02620 | 0.01145  | -0.01365 |
| 33  | 1 | -0.16689 | -0.02668 | 0.05719  |
| 16  | 1 | -0.01196 | -0.00456 | -0.11345 |
| 35  | 1 | -0.06338 | -0.00556 | 0.03747  |
| 36  | 1 | -0.02355 | -0.05020 | -0.09622 |

|     |   |          |          |          |
|-----|---|----------|----------|----------|
| 78  | 1 | 0.04291  | 0.08863  | -0.03300 |
| 37  | 1 | -0.09074 | -0.02929 | -0.05801 |
| 28  | 1 | 0.07031  | -0.15755 | 0.12549  |
| 81  | 1 | -0.00537 | -0.00155 | 0.00198  |
| 82  | 1 | -0.05880 | 0.06986  | 0.00692  |
| 51  | 1 | -0.00365 | -0.00183 | -0.00852 |
| 84  | 1 | 0.00251  | -0.05150 | -0.00943 |
| 85  | 1 | 0.00300  | 0.01830  | -0.00834 |
| 86  | 1 | 0.01490  | -0.00281 | 0.01866  |
| 87  | 1 | 0.00128  | 0.07846  | 0.01439  |
| 88  | 1 | 0.01120  | 0.01535  | -0.06983 |
| 89  | 1 | -0.02800 | 0.06329  | 0.01044  |
| 52  | 1 | -0.01296 | -0.01352 | -0.03263 |
| 53  | 1 | -0.00939 | -0.00562 | -0.00021 |
| 54  | 1 | 0.00739  | -0.00417 | 0.05104  |
| 55  | 1 | -0.01739 | -0.04910 | 0.03706  |
| 29  | 1 | 0.00915  | 0.04039  | -0.09541 |
| 30  | 1 | 0.13616  | 0.07427  | -0.08058 |
| 96  | 1 | -0.00708 | 0.01078  | -0.00111 |
| 97  | 1 | -0.01197 | 0.05679  | -0.06128 |
| 98  | 1 | -0.00467 | 0.03748  | -0.04657 |
| 58  | 1 | -0.00336 | 0.02209  | -0.00069 |
| 100 | 1 | -0.02473 | -0.04779 | 0.09759  |
| 101 | 1 | -0.01375 | -0.06036 | -0.02990 |
| 102 | 1 | -0.05965 | -0.07352 | 0.04229  |
| 103 | 1 | -0.00342 | 0.00814  | 0.03788  |
| 104 | 1 | -0.03946 | -0.05549 | 0.04827  |
| 105 | 1 | 0.13360  | 0.16100  | 0.04986  |
| 106 | 1 | -0.09855 | 0.05789  | 0.04198  |
| 107 | 1 | -0.02726 | 0.07984  | -0.00092 |
| 108 | 1 | 0.03423  | 0.04479  | 0.00263  |
| 109 | 1 | 0.06339  | 0.08177  | 0.04804  |
| 110 | 1 | 0.00605  | -0.01753 | -0.01220 |
| 111 | 1 | 0.03094  | 0.02892  | -0.00058 |
| 112 | 1 | 0.00330  | -0.00423 | 0.08569  |
| 113 | 1 | 0.02019  | -0.05092 | -0.00029 |
| 114 | 1 | 0.01364  | -0.02030 | 0.04213  |
| 115 | 1 | -0.02265 | -0.08356 | -0.02602 |
| 116 | 1 | 0.04713  | -0.03025 | 0.04627  |
| 117 | 1 | -0.04232 | -0.09577 | 0.08062  |
| 118 | 1 | -0.05514 | -0.08766 | 0.03459  |
| 119 | 1 | 0.00971  | -0.03601 | 0.03107  |
| 120 | 1 | -0.07470 | -0.08497 | 0.00546  |
| 121 | 1 | 0.06232  | -0.00187 | -0.00151 |
| 122 | 1 | -0.01522 | 0.02291  | 0.01176  |
| 123 | 1 | -0.06058 | 0.02545  | -0.03339 |
| 124 | 1 | 0.02705  | -0.00704 | 0.00076  |
| 125 | 1 | 0.00178  | -0.02161 | -0.08539 |
| 126 | 1 | 0.03669  | 0.08740  | 0.01181  |
| 127 | 1 | 0.03533  | -0.00430 | -0.00446 |
| 128 | 1 | -0.01183 | -0.09471 | -0.02028 |
| 129 | 1 | -0.04908 | -0.04371 | 0.01471  |
| 130 | 1 | 0.02685  | -0.04521 | 0.02108  |
| 131 | 1 | -0.06331 | -0.00001 | 0.03829  |
| 132 | 1 | -0.00027 | 0.00281  | -0.00912 |
| 133 | 1 | -0.02650 | 0.01488  | 0.00017  |

|     |   |          |          |          |
|-----|---|----------|----------|----------|
| 134 | 1 | 0.02158  | -0.03143 | -0.01103 |
| 135 | 1 | 0.00399  | 0.00069  | 0.01751  |
| 136 | 1 | 0.04966  | -0.06008 | 0.03056  |
| 137 | 1 | -0.04168 | 0.02574  | -0.04303 |
| 138 | 1 | -0.02254 | -0.04325 | 0.01129  |
| 139 | 1 | -0.03690 | 0.00454  | 0.03719  |
| 140 | 1 | 0.00083  | 0.07019  | -0.01086 |
| 59  | 1 | 0.02405  | 0.01869  | 0.00184  |
| 60  | 1 | -0.04388 | 0.04502  | 0.01837  |
| 143 | 1 | 0.12265  | 0.13395  | -0.06273 |
| 41  | 1 | 0.09214  | 0.00144  | 0.04713  |
| 145 | 1 | 0.14460  | 0.08265  | -0.07471 |

| Dipole (Debyes) | x      | y     | z     | Total |
|-----------------|--------|-------|-------|-------|
| Point-Chg.      | 4.145  | 4.404 | 1.330 | 6.193 |
| sp Hybrid       | -0.082 | 0.200 | 0.657 | 0.691 |
| pd Hybrid       | 0.000  | 0.000 | 0.000 | 0.000 |
| Sum             | 4.064  | 4.605 | 1.987 | 6.455 |
